# Supplementary material for: Reliability and applicability of the Patient Enablement Instrument (PEI) in a Swedish general practice setting
Source: PubMed Central journal article supplement (PMC4353449; doi:10.1186/s12875-015-0242-9), 2015-03-04
Supplement: 12875_2015_242_MOESM1_ESM.pdf [file 12875_2015_242_MOESM1_ESM.pdf]

Appendix 1: Swedish translation of the PEI adapted from the original English version.

Som en följd av ditt läkarbesök känner du att du...

*(As a result of your visit to the doctor today, do you feel you are...)*

|                                                                           | Mycket bättre<br><i>(Much better)</i> | Bättre<br><i>(Better)</i> | Som tidigare<br>eller sämre<br><i>(Same or less)</i> | Ej relevant<br>eller<br><i>(Not applicable)</i> * |
|---------------------------------------------------------------------------|---------------------------------------|---------------------------|------------------------------------------------------|---------------------------------------------------|
| ...kan hantera livet<br><i>(...able to cope with life)</i>                | <input type="checkbox"/>              | <input type="checkbox"/>  | <input type="checkbox"/>                             | <input type="checkbox"/>                          |
| ...kan förstå din sjukdom<br><i>(...able to understand your illness)</i>  | <input type="checkbox"/>              | <input type="checkbox"/>  | <input type="checkbox"/>                             | <input type="checkbox"/>                          |
| ...kan hantera din sjukdom<br><i>(...able to cope with your illness)</i>  | <input type="checkbox"/>              | <input type="checkbox"/>  | <input type="checkbox"/>                             | <input type="checkbox"/>                          |
| ...kan hålla dig själv frisk<br><i>(...able to keep yourself healthy)</i> | <input type="checkbox"/>              | <input type="checkbox"/>  | <input type="checkbox"/>                             | <input type="checkbox"/>                          |

|                                                                      | Mycket mer<br><i>(much more)</i> | Mer<br><i>(more)</i>     | Samma eller<br>mindre<br><i>(same or less)</i> | Ej relevant<br><i>(not applicable)</i> |
|----------------------------------------------------------------------|----------------------------------|--------------------------|------------------------------------------------|----------------------------------------|
| ...är trygg med din hälsa<br><i>(...confident about your health)</i> | <input type="checkbox"/>         | <input type="checkbox"/> | <input type="checkbox"/>                       | <input type="checkbox"/>               |
| ...kan hjälpa dig själv<br><i>(...able to help yourself)</i>         | <input type="checkbox"/>         | <input type="checkbox"/> | <input type="checkbox"/>                       | <input type="checkbox"/>               |
